# Supplementary material for: Hydroxyapatite-Based Coatings on Silicon Wafers and Printed Zirconia
Source: MDPI journal article supplement (doi:10.3390/jfb15010011), 2023-12-27
Supplement: s1 [file s1]

# Hydroxyapatite-Based Coatings on Silicon Wafers and Printed Zirconia

Antoine Chauvin <sup>1</sup>, Marie-Rose Garda <sup>1</sup>, Nathan Snyder <sup>2</sup>, Bai Cui <sup>2</sup>, Nicolas Delpouve <sup>1,\*</sup> and Li Tan <sup>2</sup>

<sup>1</sup> Groupe de Physique des Matériaux UMR 6634, CNRS, Université de Rouen Normandie, INSA Rouen Normandie, F-76000 Rouen, France; marie-rose.garda@univ-rouen.fr (M.-R.G.)

<sup>2</sup> Department of Mechanical and Materials Engineering, University of Nebraska, Lincoln, NE 68588, USA; bcui@unl.edu (B.C.); ltan4@unl.edu (L.T.)

\* Correspondence: nicolas.delpouve1@univ-rouen.fr; Tel.: +33-(0)232955165

## Supporting Information:

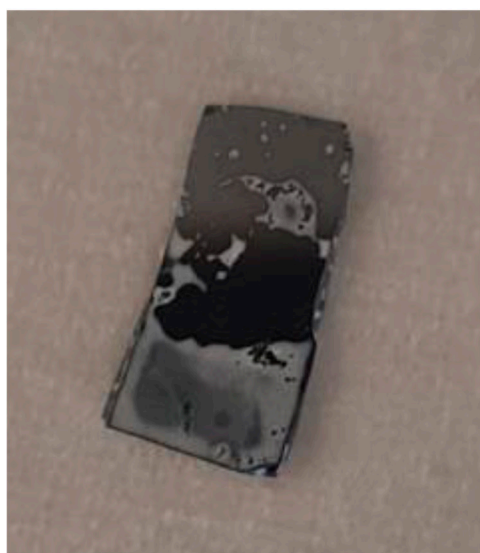

(a)

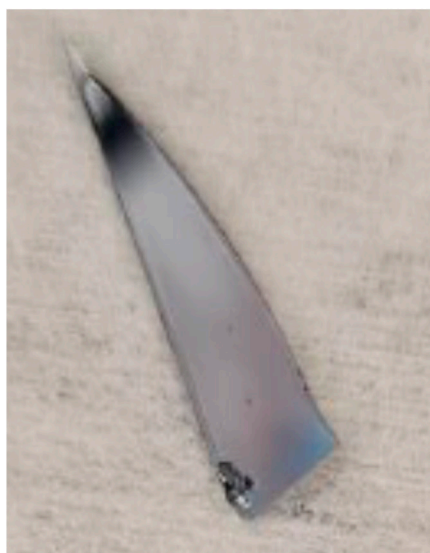

(b)

**Figure S1:** Surface state after the removal of a piece of tape stuck on the coating. In this case, the HAp coating (a) did not bear the tearing solicitation, while the PEI/HAp coating (b) showed better adhesion.
